# Supplementary material
Source: publisher figshare collection journal article supplement (https://karger.figshare.com/ndownloader/files/25818617)
Supplement: Supplementary file 1 [file 25818617]

**Table S5.** Incidence of anaphylaxis according to the number of lipid transfer protein (LTP) reactivities, including Pru p 3, Ara h 9, Jug r 3, Pla a 3, Cor a 8 and/or Art v 3

| **Nº LTPs** | **Nº patients** | **Anaphylaxis**  **nº (%)** |
| --- | --- | --- |
| 1 | 39 | 9 (23.1) |
| 2 | 30 | 6 (20.0) |
| 3 | 41 | 11 (27.5) |
| 4 | 50 | 16 (32.0) |
| ≥ 5 | 261 | 115 (44.1) |
